# Supplementary material for: Dengue Incidence and Aedes Vector Collections in Relation to COVID-19 Population Mobility Restrictions
Source: MDPI journal article supplement (doi:10.3390/tropicalmed7100287), 2022-10-07
Supplement: s1 [file s1]

**Supplementary Table S1.** Monthly predicted number of dengue cases for the whole Sri Lanka from 1 May 2021 to 31 July 2022

| Month                                                                                                                  | Dengue Incidence in all of Sri Lanka |               |
|------------------------------------------------------------------------------------------------------------------------|--------------------------------------|---------------|
|                                                                                                                        | Actual                               | Predicted     |
| May 2021                                                                                                               | 876                                  | 4748          |
| June 2021                                                                                                              | 1586                                 | 6632          |
| July 2021                                                                                                              | 2776                                 | 10209         |
| August 2021                                                                                                            | 878                                  | 7310          |
| September 2021                                                                                                         | 691                                  | 4583          |
| October 2021                                                                                                           | 2175                                 | 5178          |
| November 2021                                                                                                          | 2890                                 | 8061          |
| December 2021                                                                                                          | 5528                                 | 10826         |
| January 2022                                                                                                           | 6509                                 | 10511         |
| February 2022                                                                                                          | 2773                                 | 6309          |
| March 2022                                                                                                             | 2344                                 | 5055          |
| April 2022                                                                                                             | 3645                                 | 4087          |
| May 2022                                                                                                               | 4518                                 | 5034          |
| June 2022                                                                                                              | 6813                                 | 7046          |
| July 2022                                                                                                              | 10594                                | 10880         |
| <b>Total</b>                                                                                                           | <b>54596</b>                         | <b>106468</b> |
| Probability of significant difference between actual and predicted cases P by the Wilcoxon signed-rank test is 0.00006 |                                      |               |

**Legend to Table S1.** Periods B and C are shown in colours that correspond to Tables and Figure in the main text.
