# Supplementary material for: Dengue Incidence and Aedes Vector Collections in Relation to COVID-19 Population Mobility Restrictions
Source: MDPI journal article supplement (doi:10.3390/tropicalmed7100287), 2022-10-07
Supplement: s1 [file s1]

**Supplementary Table S3: Statistical comparison of the predicted and reported actual dengue cases in each district of Sri Lanka from 1 May 2021 to 31 July 2022 (Periods B and C) and separately from 1 December 2021 to 31 July 2022 (Period C)**

| District    | 1 May 2021 to 31 July 2022 |           |           | 1 December 2021 to 31 July 2022 |           |          |
|-------------|----------------------------|-----------|-----------|---------------------------------|-----------|----------|
|             | Actual                     | Predicted | ‡P value  | Actual                          | Predicted | ‡P value |
| Colombo     | 13496                      | 12369     | 0.9341    | 9437                            | 6620      | 0.1484   |
| Gampaha     | 8060                       | 9822      | 0.1514    | 5734                            | 4902      | 0.3828   |
| Kalutara    | 3956                       | 6443      | 0.0006104 | 3001                            | 3534      | 0.07813  |
| Kandy       | 3665                       | 6863      | 0.02155   | 3126                            | 3412      | 0.5469   |
| Matale      | 898                        | 2785      | 0.0008545 | 708                             | 1519      | 0.1094   |
| N Eliya     | 194                        | 755       | 0.0007229 | 164                             | 410       | 0.007813 |
| Galle       | 3031                       | 9569      | 6.104e-05 | 2692                            | 5110      | 0.007813 |
| Hambantota  | 1250                       | 1514      | 0.125     | 1030                            | 877       | 1.000    |
| Matara      | 1516                       | 2465      | 0.01508   | 1145                            | 1340      | 0.5469   |
| Jaffna      | 2540                       | 6889      | 0.008362  | 2489                            | 4653      | 0.3125   |
| Kilinochchi | 111                        | 580       | 0.0007247 | 106                             | 416       | 0.007813 |
| Mannar      | 542                        | 373       | 0.06068   | 525                             | 290       | 0.726    |
| Vavuniya    | 94                         | 1557      | 0.0007247 | 77                              | 914       | 0.01415  |
| Mullaitivu  | 50                         | 314       | 0.001961  | 46                              | 206       | 0.03906  |
| Batticaloa  | 1275                       | 6992      | 6.104e-05 | 1050                            | 4977      | 0.007813 |
| Ampara      | 1489                       | 5640      | 0.0001831 | 1369                            | 4048      | 0.02344  |
| Trincomalee | 1118                       | 9453      | 6.104e-05 | 1051                            | 7334      | 0.007813 |
| Kurunegala  | 3207                       | 2105      | 0.1054    | 2336                            | 1134      | 0.007813 |
| Puttalam    | 1699                       | 1038      | 0.09933   | 1537                            | 557       | 0.01415  |
| Apura       | 417                        | 1587      | 0.0007211 | 294                             | 924       | 0.01415  |
| Polonnaruwa | 677                        | 2966      | 0.0007247 | 624                             | 1812      | 0.01415  |
| Badulla     | 920                        | 1945      | 0.0008545 | 453                             | 965       | 0.03906  |
| Moneragala  | 789                        | 490       | 0.5508    | 694                             | 239       | 0.04206  |
| Ratnapura   | 1285                       | 5263      | 6.104e-05 | 986                             | 2820      | 0.007813 |
| Kegalle     | 2316                       | 2427      | 0.4887    | 2050                            | 1259      | 0.02344  |

‡Probability P calculated by the Wilcoxon signed-rank test
