# Supplementary material for: Dengue Incidence and Aedes Vector Collections in Relation to COVID-19 Population Mobility Restrictions
Source: MDPI journal article supplement (doi:10.3390/tropicalmed7100287), 2022-10-07
Supplement: s1 [file s1]

**Supplementary Table S4:** Ovitrap collections of *Aedes aegypti* and *Aedes albopictus* larvae in Gurunagar, Jaffna

**(i) Present Study May 2021 to April 2022 (periods B and C)**

| Month          | <i>Aedes aegypti</i> |      | <i>Aedes albopictus</i> |      |
|----------------|----------------------|------|-------------------------|------|
|                | No. of larvae        | + ve | No. of larvae           | + ve |
| May 2021       | 121                  | 5/10 | 53                      | 2/10 |
| June 2021      | 164                  | 6/10 | 71                      | 3/10 |
| July 2021      | 160                  | 6/10 | 68                      | 2/10 |
| August 2021    | 202                  | 7/10 | 65                      | 2/10 |
| September 2021 | 212                  | 8/10 | 81                      | 3/10 |
| October 2021   | 198                  | 6/10 | 88                      | 3/10 |
| November 2021  | 153                  | 6/10 | 96                      | 3/10 |
| December 2021  | 165                  | 5/10 | 115                     | 3/10 |
| January 2022   | 106                  | 4/10 | 176                     | 5/10 |
| February 2022  | 95                   | 5/10 | 119                     | 4/10 |
| March 2022     | 105                  | 5/10 | 146                     | 4/10 |
| April 2022     | 32                   | 2/10 | 165                     | 6/10 |
| <b>Total</b>   | <b>1713</b>          |      | <b>1243</b>             |      |

**(ii) August 2020 to April 2021 - data from [1]**

| Month          | <i>Aedes aegypti</i> |      | <i>Aedes albopictus</i> |      |
|----------------|----------------------|------|-------------------------|------|
|                | No. of larvae        | + ve | No. of larvae           | + ve |
| August 2020    | 22                   | 2/10 | 18                      | 2/10 |
| September 2020 | 56                   | 3/10 | 40                      | 2/10 |
| October 2020   | 12                   | 1/10 | 0                       | 0/10 |
| November 2020  | 0                    | 0/10 | 56                      | 3/10 |
| December 2020  | 0                    | 0/10 | 18                      | 1/10 |
| January 2021   | 0                    | 0/10 | 70                      | 4/10 |
| February 2021  | 0                    | 0/10 | 6                       | 1/10 |
| March 2021     | 0                    | 0/10 | 16                      | 1/10 |
| April 2021     | 0                    | 0/10 | 58                      | 3/10 |
| <b>Total</b>   | <b>90</b>            |      | <b>282</b>              |      |

**(iii) March 2019 to December 2019 - pre-pandemic data from [10]**

| Month          | <i>Aedes aegypti</i> |      | <i>Aedes albopictus</i> |      |
|----------------|----------------------|------|-------------------------|------|
|                | No. of larvae        | + ve | No. of larvae           | + ve |
| March 2019     | 109                  | 6/9  | 7                       | 1/9  |
| April 2019     | 289                  | 9/9  | 117                     | 4/9  |
| May 2019       | 285                  | 9/9  | 132                     | 7/9  |
| June 2019      | 246                  | 7/9  | 109                     | 6/9  |
| July 2019      | 235                  | 9/9  | 170                     | 6/9  |
| August 2019    | 261                  | 8/9  | 160                     | 5/9  |
| September 2019 | 274                  | 9/9  | 205                     | 6/9  |
| October 2019   | 281                  | 9/9  | 181                     | 6/9  |
| November 2019  | 199                  | 8/9  | 184                     | 5/9  |
| December 2019  | 201                  | 6/9  | 55                      | 5/9  |
| <b>Total</b>   | <b>2380</b>          |      | <b>1320</b>             |      |

**Legend to Table S4.** +ve – number of ovitraps with *Aedes* larvae out of the total number of ovitraps placed. Colour codes correspond to periods A, B and C in text and Table 1.
