# Supplementary material for: Dengue Incidence and Aedes Vector Collections in Relation to COVID-19 Population Mobility Restrictions
Source: MDPI journal article supplement (doi:10.3390/tropicalmed7100287), 2022-10-07
Supplement: s1 [file s1]

**Supplementary Table S2:** Monthly predicted and reported number of dengue cases of each of the 25 districts of Sri Lanka from 1 May 2021 to 31 July 2022

| Month        | Colombo      |              | Gampaha     |             | Kalutara    |             | Kandy       |             | Matale     |             |
|--------------|--------------|--------------|-------------|-------------|-------------|-------------|-------------|-------------|------------|-------------|
|              | Actual       | Predicted    | Actual      | Predicted   | Actual      | Predicted   | Actual      | Predicted   | Actual     | Predicted   |
| May-21       | 258          | 575          | 102         | 367         | 64          | 302         | 37          | 288         | 6          | 89          |
| Jun-21       | 588          | 860          | 289         | 676         | 112         | 439         | 40          | 414         | 17         | 139         |
| Jul-21       | 959          | 1392         | 527         | 1197        | 290         | 726         | 129         | 622         | 58         | 182         |
| Aug-21       | 286          | 964          | 113         | 898         | 83          | 485         | 68          | 500         | 33         | 160         |
| Sep-21       | 245          | 519          | 123         | 541         | 84          | 279         | 32          | 444         | 9          | 95          |
| Oct-21       | 789          | 576          | 444         | 474         | 170         | 269         | 102         | 547         | 32         | 189         |
| Nov-21       | 934          | 863          | 728         | 767         | 152         | 409         | 131         | 636         | 35         | 412         |
| Dec-21       | 1337         | 1265         | 1186        | 923         | 441         | 517         | 225         | 680         | 39         | 446         |
| Jan-22       | 1295         | 1128         | 1259        | 671         | 329         | 509         | 310         | 523         | 55         | 263         |
| Feb-22       | 499          | 660          | 332         | 368         | 161         | 334         | 113         | 307         | 42         | 142         |
| Mar-22       | 349          | 515          | 246         | 323         | 204         | 319         | 102         | 236         | 25         | 130         |
| Apr-22       | 504          | 406          | 346         | 285         | 303         | 260         | 157         | 205         | 33         | 67          |
| May-22       | 834          | 534          | 421         | 397         | 403         | 331         | 326         | 310         | 60         | 100         |
| June-22      | 1810         | 807          | 708         | 692         | 459         | 475         | 652         | 463         | 207        | 159         |
| July-22      | 2809         | 1305         | 1236        | 1243        | 701         | 789         | 1241        | 688         | 247        | 212         |
| <b>Total</b> | <b>13496</b> | <b>12369</b> | <b>8060</b> | <b>9822</b> | <b>3956</b> | <b>6443</b> | <b>3665</b> | <b>6863</b> | <b>898</b> | <b>2785</b> |

| Month        | N Eliya    |            | Galle       |             | Hambantota  |             | Matara      |             | Jaffna      |             |
|--------------|------------|------------|-------------|-------------|-------------|-------------|-------------|-------------|-------------|-------------|
|              | Actual     | Predicted  | Actual      | Predicted   | Actual      | Predicted   | Actual      | Predicted   | Actual      | Predicted   |
| May-21       | 4          | 31         | 18          | 536         | 18          | 51          | 15          | 83          | 10          | 178         |
| Jun-21       | 3          | 43         | 55          | 804         | 39          | 78          | 93          | 112         | 10          | 214         |
| Jul-21       | 5          | 101        | 62          | 980         | 68          | 150         | 111         | 273         | 4           | 286         |
| Aug-21       | 2          | 60         | 24          | 719         | 14          | 100         | 31          | 234         | 3           | 220         |
| Sep-21       | 3          | 31         | 41          | 372         | 16          | 69          | 23          | 142         | 1           | 215         |
| Oct-21       | 3          | 35         | 74          | 371         | 40          | 79          | 51          | 137         | 2           | 355         |
| Nov-21       | 10         | 44         | 65          | 677         | 25          | 110         | 47          | 144         | 21          | 768         |
| Dec-21       | 12         | 52         | 135         | 686         | 58          | 120         | 82          | 167         | 165         | 1419        |
| Jan-22       | 25         | 55         | 299         | 654         | 104         | 149         | 92          | 234         | 405         | 1258        |
| Feb-22       | 11         | 34         | 176         | 357         | 58          | 113         | 75          | 157         | 222         | 591         |
| Mar-22       | 14         | 20         | 176         | 310         | 40          | 99          | 60          | 116         | 247         | 437         |
| Apr-22       | 11         | 18         | 284         | 309         | 91          | 77          | 110         | 101         | 450         | 228         |
| May-22       | 18         | 38         | 374         | 640         | 139         | 57          | 141         | 100         | 374         | 188         |
| June-22      | 25         | 57         | 523         | 958         | 134         | 90          | 239         | 135         | 382         | 228         |
| July-22      | 48         | 136        | 725         | 1196        | 406         | 172         | 346         | 330         | 244         | 304         |
| <b>Total</b> | <b>194</b> | <b>755</b> | <b>3031</b> | <b>9569</b> | <b>1250</b> | <b>1514</b> | <b>1516</b> | <b>2465</b> | <b>2540</b> | <b>6889</b> |

| Month        | Kilinochchi |            | Mannar     |            | Vavuniya  |             | Mulativu  |            | Batticaloa  |             |
|--------------|-------------|------------|------------|------------|-----------|-------------|-----------|------------|-------------|-------------|
|              | Actual      | Predicted  | Actual     | Predicted  | Actual    | Predicted   | Actual    | Predicted  | Actual      | Predicted   |
| May-21       | 0           | 14         | 0          | 14         | 3         | 50          | 2         | 12         | 91          | 480         |
| Jun-21       | 1           | 17         | 1          | 9          | 2         | 58          | 0         | 3          | 50          | 404         |
| Jul-21       | 1           | 29         | 3          | 8          | 3         | 60          | 0         | 16         | 26          | 338         |
| Aug-21       | 1           | 19         | 1          | 6          | 0         | 58          | 0         | 13         | 8           | 192         |
| Sep-21       | 1           | 21         | 0          | 4          | 0         | 62          | 0         | 2          | 3           | 120         |
| Oct-21       | 0           | 24         | 3          | 17         | 3         | 90          | 1         | 20         | 22          | 169         |
| Nov-21       | 1           | 40         | 9          | 25         | 6         | 265         | 1         | 42         | 25          | 312         |
| Dec-21       | 13          | 54         | 354        | 94         | 12        | 302         | 1         | 57         | 84          | 685         |
| Jan-22       | 24          | 69         | 110        | 100        | 21        | 160         | 12        | 71         | 106         | 851         |
| Feb-22       | 8           | 50         | 25         | 34         | 12        | 104         | 5         | 24         | 85          | 779         |
| Mar-22       | 10          | 68         | 5          | 16         | 6         | 71          | 5         | 13         | 100         | 700         |
| Apr-22       | 13          | 53         | 6          | 13         | 5         | 21          | 8         | 4          | 196         | 602         |
| May-22       | 16          | 35         | 3          | 14         | 4         | 69          | 2         | 11         | 234         | 534         |
| June-22      | 12          | 40         | 14         | 10         | 5         | 95          | 7         | 6          | 136         | 450         |
| July-22      | 10          | 47         | 8          | 9          | 12        | 92          | 6         | 20         | 109         | 376         |
| <b>Total</b> | <b>111</b>  | <b>580</b> | <b>542</b> | <b>373</b> | <b>94</b> | <b>1557</b> | <b>50</b> | <b>314</b> | <b>1275</b> | <b>6992</b> |

| Month        | Ampara      |             | Trincomalee |             | Kurunegala  |             | Puttalam    |             | Apura      |             |
|--------------|-------------|-------------|-------------|-------------|-------------|-------------|-------------|-------------|------------|-------------|
|              | Actual      | Predicted   | Actual      | Predicted   | Actual      | Predicted   | Actual      | Predicted   | Actual     | Predicted   |
| May-21       | 40          | 226         | 7           | 462         | 56          | 113         | 12          | 45          | 31         | 63          |
| Jun-21       | 19          | 217         | 6           | 433         | 84          | 155         | 27          | 67          | 18         | 90          |
| Jul-21       | 11          | 244         | 1           | 437         | 213         | 233         | 41          | 105         | 30         | 144         |
| Aug-21       | 6           | 191         | 2           | 199         | 77          | 160         | 18          | 52          | 14         | 109         |
| Sep-21       | 3           | 154         | 5           | 134         | 47          | 78          | 6           | 42          | 9          | 63          |
| Oct-21       | 22          | 157         | 6           | 120         | 158         | 76          | 19          | 53          | 9          | 63          |
| Nov-21       | 19          | 403         | 40          | 334         | 236         | 156         | 39          | 117         | 12         | 131         |
| Dec-21       | 53          | 785         | 86          | 1027        | 471         | 170         | 207         | 126         | 27         | 162         |
| Jan-22       | 227         | 1104        | 110         | 1416        | 640         | 200         | 435         | 115         | 59         | 178         |
| Feb-22       | 81          | 601         | 107         | 1045        | 209         | 127         | 222         | 61          | 37         | 126         |
| Mar-22       | 83          | 430         | 102         | 1092        | 118         | 96          | 111         | 37          | 30         | 83          |
| Apr-22       | 148         | 303         | 278         | 925         | 108         | 78          | 107         | 29          | 26         | 67          |
| May-22       | 231         | 269         | 240         | 633         | 113         | 104         | 112         | 39          | 20         | 65          |
| June-22      | 387         | 259         | 90          | 595         | 254         | 144         | 139         | 58          | 33         | 92          |
| July-22      | 159         | 297         | 38          | 601         | 423         | 215         | 204         | 92          | 62         | 151         |
| <b>Total</b> | <b>1489</b> | <b>5640</b> | <b>1118</b> | <b>9453</b> | <b>3207</b> | <b>2105</b> | <b>1699</b> | <b>1038</b> | <b>417</b> | <b>1587</b> |

| Month        | Polonnaruwa |             | Badulla    |             | Moneragala |            | Ratnapura   |             | Kegalle     |             |
|--------------|-------------|-------------|------------|-------------|------------|------------|-------------|-------------|-------------|-------------|
|              | Actual      | Predicted   | Actual     | Predicted   | Actual     | Predicted  | Actual      | Predicted   | Actual      | Predicted   |
| May-21       | 11          | 120         | 12         | 63          | 5          | 9          | 35          | 319         | 38          | 126         |
| Jun-21       | 8           | 151         | 58         | 132         | 15         | 34         | 26          | 407         | 25          | 173         |
| Jul-21       | 7           | 266         | 47         | 199         | 25         | 74         | 85          | 591         | 70          | 233         |
| Aug-21       | 8           | 155         | 17         | 135         | 11         | 48         | 33          | 395         | 25          | 206         |
| Sep-21       | 4           | 110         | 14         | 102         | 3          | 24         | 13          | 241         | 6           | 136         |
| Oct-21       | 5           | 134         | 117        | 152         | 20         | 31         | 44          | 205         | 39          | 133         |
| Nov-21       | 10          | 218         | 202        | 197         | 16         | 31         | 63          | 285         | 63          | 161         |
| Dec-21       | 20          | 260         | 229        | 198         | 29         | 36         | 126         | 298         | 136         | 181         |
| Jan-22       | 34          | 274         | 26         | 186         | 251        | 26         | 37          | 320         | 244         | 182         |
| Feb-22       | 62          | 224         | 5          | 90          | 52         | 5          | 22          | 256         | 152         | 121         |
| Mar-22       | 80          | 160         | 8          | 78          | 41         | 3          | 27          | 264         | 155         | 101         |
| Apr-22       | 145         | 165         | 8          | 71          | 45         | 7          | 34          | 251         | 229         | 100         |
| May-22       | 125         | 163         | 4          | 64          | 47         | 5          | 33          | 345         | 244         | 136         |
| June-22      | 124         | 200         | 16         | 136         | 139        | 63         | 65          | 440         | 253         | 186         |
| July-22      | 34          | 366         | 157        | 142         | 90         | 94         | 642         | 646         | 637         | 252         |
| <b>Total</b> | <b>677</b>  | <b>2966</b> | <b>920</b> | <b>1945</b> | <b>789</b> | <b>490</b> | <b>1285</b> | <b>5263</b> | <b>2316</b> | <b>2427</b> |

**Legend to Table S2.** The colours used correspond to periods B and C in other Figures and Tables.
