# Supplementary material for: Dengue Incidence and Aedes Vector Collections in Relation to COVID-19 Population Mobility Restrictions
Source: Trop Med Infect Dis. 2022 Oct 7;7(10):287. doi: 10.3390/tropicalmed7100287 (PMC9612376; doi:10.3390/tropicalmed7100287)
Supplement: Supplementary file 1 [file tropicalmed-07-00287-s001.zip]

Archive with 4 entries (4 files):
- Table _S1.pdf
- Table_S2.pdf
- Table_S3.pdf
- Table_S4.pdf
